# Supplementary material for: Comparative evaluation of the Ifakara tent trap-B, the standardized resting boxes and the human landing catch for sampling malaria vectors and other mosquitoes in urban Dar es Salaam, Tanzania
Source: PubMed Central journal article supplement (PMC2734863; doi:10.1186/1475-2875-8-197), 2009-08-12
Supplement: 1475-2875-8-197-S1.pdf [file 1475-2875-8-197-S1.pdf]

**Table S1:** A summary of the totals, means and relative sensitivity of *An. gambiae s.l.* and *Cx.* species caught by the ITT-B, HLC and SRB

| Collection<br>method | Trap<br>nights | <i>An. gambiae s.l.</i> |        |       |                         |                                      | <i>Cx. species</i> |        |       |                         |                                      |
|----------------------|----------------|-------------------------|--------|-------|-------------------------|--------------------------------------|--------------------|--------|-------|-------------------------|--------------------------------------|
|                      |                | Total catch             |        |       | Mean catch <sup>a</sup> | Relative<br>sensitivity <sup>b</sup> | Total catch        |        |       | Mean catch <sup>a</sup> | Relative<br>sensitivity <sup>b</sup> |
|                      |                | Male                    | Female | Total |                         |                                      | Male               | Female | Total |                         |                                      |
|                      |                |                         |        |       |                         |                                      |                    |        |       |                         |                                      |
| ITT-B                | 606            | 33                      | 135    | 168   | 0.27                    | 0.35                                 | 8634               | 17689  | 26315 | 43.42                   | 0.63                                 |
| SRB                  | 379            | 19                      | 27     | 46    | 0.12                    | 0.15                                 | 1786               | 3005   | 4791  | 12.64                   | 0.18                                 |
| HLC                  | 195            | 0                       | 143    | 143   | 0.78                    | 1.00 <sup>c</sup>                    | 279                | 12979  | 13258 | 67.99                   | 1.00 <sup>c</sup>                    |

<sup>a</sup>=Mean *An. gambiae s.l.* and *Cx. species* caught per night.

<sup>b</sup>=Crude estimate relative to HLC, calculated by dividing the mean trap catch by that of the HLC.

<sup>c</sup>=Reference trap.
