# Supplementary material for: Comparative evaluation of the Ifakara tent trap-B, the standardized resting boxes and the human landing catch for sampling malaria vectors and other mosquitoes in urban Dar es Salaam, Tanzania
Source: PubMed Central journal article supplement (PMC2734863; doi:10.1186/1475-2875-8-197), 2009-08-12
Supplement: 1475-2875-8-197-S3.pdf [file 1475-2875-8-197-S3.pdf]

**Table S3:** Regression analysis using generalized estimating equations (GEE) to determine density dependence relative sampling efficiency of the ITT-B and the SRB for *An. gambiae s.l.* and the *Cx.* species

| Species                 | Alternative/HLC | Versus Alternative method+ HLC <sup>a</sup> |                         |                    |
|-------------------------|-----------------|---------------------------------------------|-------------------------|--------------------|
|                         |                 | Parameter                                   | Estimate [95% CI]       | P                  |
| <i>An. gambiae s.l.</i> | ITT-B           | Log <sub>10</sub> (HLC+alternative)         | NA                      | 0.733 <sup>b</sup> |
|                         |                 | Intercept                                   | -0.781 [-0.941, -0.621] | <0.001             |
| <i>Cx.</i> species      | ITT-B           | Log <sub>10</sub> (HLC+alternative)         | NA                      | 0.096 <sup>b</sup> |
|                         |                 | Intercept                                   | -0.969 [-1.282, -0.650] | <0.001             |
|                         | SRB             | Log <sub>10</sub> (HLC+alternative)         | NA                      | 0.992 <sup>b</sup> |
|                         |                 | Intercept                                   | -1.960 [-2.399, -1.521] | <0.001             |

<sup>a</sup>=Reference method

<sup>b</sup> = Not statistically significant and therefore not included in the model

NA=Not applicable

CI=Confidence interval
