# Supplementary material for: Comparative evaluation of the Ifakara tent trap-B, the standardized resting boxes and the human landing catch for sampling malaria vectors and other mosquitoes in urban Dar es Salaam, Tanzania
Source: PubMed Central journal article supplement (PMC2734863; doi:10.1186/1475-2875-8-197), 2009-08-12
Supplement: 1475-2875-8-197-S4.pdf [file 1475-2875-8-197-S4.pdf]

**Table S4:** Abdominal condition scored by the three traps for *An. gambiae s.l.* and *Cx.* species and the influence of each trap on the fed mosquitoes determined by binary logistic regression

| Species                 | Variable  |               |                      |        |
|-------------------------|-----------|---------------|----------------------|--------|
|                         | Trap type | Proportion    | Odds [95% CI]        | P      |
| <i>An. gambiae s.l.</i> | ITT-B     | 0.08 [n=135]  | 1.38 [0.55, 3.42]    | 0.493  |
|                         | SRB       | 0.37 [n=27]   | 9.53 [3.57, 25.47]   | <0.001 |
|                         | HLC       | 0.06 [n=143]  | 1.00 <sup>a</sup>    | NA     |
| <i>Cx.</i> species      | ITT-B     | 0.06 [n=6661] | 6.66 [4.86, 9.12]    | <0.001 |
|                         | SRB       | 0.21 [n=1351] | 29.76 [21.52, 41.15] | <0.001 |
|                         | HLC       | 0.01 [n=4975] | 1.00 <sup>a</sup>    | NA     |

<sup>a</sup>=Reference method

n=Total number of mosquitoes

NA=Not applicable

CI=Confidence interval
