# Supplementary material for: Comparative evaluation of the Ifakara tent trap-B, the standardized resting boxes and the human landing catch for sampling malaria vectors and other mosquitoes in urban Dar es Salaam, Tanzania
Source: PubMed Central journal article supplement (PMC2734863; doi:10.1186/1475-2875-8-197), 2009-08-12
Supplement: 1475-2875-8-197-S5.pdf [file 1475-2875-8-197-S5.pdf]

**Table S5:** Species composition of *An. gambiae* complex for the ITT-B, HLC and SRB and the influence of each trap upon the proportion of *An. gambiae s.s.* sampled, as determined by binary logistic regression

| Trap type | <i>An. gambiae s.s.</i> |                    |       |
|-----------|-------------------------|--------------------|-------|
|           | Proportion              | Odds [95% CI]      | P     |
| ITT-B     | 0.54 [n=110]            | 0.52 [0.23, 1.17]  | 0.115 |
| SRB       | 0.48 [n=26]             | 1.80 [0.21, 15.12] | 0.588 |
| HLC       | 0.61 [n=132]            | 1.00 <sup>a</sup>  | NA    |

<sup>a</sup>=Reference trap

n=Total number of mosquitoes

CI=Confidence interval

NA=Not applicable
