# Supplementary material for: Comparative evaluation of the Ifakara tent trap-B, the standardized resting boxes and the human landing catch for sampling malaria vectors and other mosquitoes in urban Dar es Salaam, Tanzania
Source: PubMed Central journal article supplement (PMC2734863; doi:10.1186/1475-2875-8-197), 2009-08-12
Supplement: 1475-2875-8-197-S6.pdf [file 1475-2875-8-197-S6.pdf]

**Table S6:** Comparative evaluation of cost effectiveness of the ITT-B and the HLC for weekly sampling and sampling a single *An. gambiae s.l.* and *Cx.* Species

| Type of cost                                         | Item                 | Details                                            | Quantity |                 | Total amount for | Total amount for   |
|------------------------------------------------------|----------------------|----------------------------------------------------|----------|-----------------|------------------|--------------------|
|                                                      |                      |                                                    | ITT-B    | HLC             | HLC/ week/ site  | ITT-B / week/ site |
| Initial set up costs                                 | Traps                | ITT-B                                              | 12       | NA              | NA               | \$2.10             |
|                                                      |                      | Maintained and depreciated over 5 years            | NA       | 7.5 km x \$0.50 | \$4.40           | NA                 |
|                                                      |                      | Bicycles maintenance and depreciation over 5 years | 12       | NA              | NA               | \$0.37             |
|                                                      | Collecting materials | Aspirators and torches                             | 12       | 12              | \$0.25           | \$0.25             |
| Total Initial set up cost per week per sampling site |                      |                                                    |          |                 | \$4.65           | \$2.74             |

|                    |                                                   |                           |       |                     |                     |                      |                     |
|--------------------|---------------------------------------------------|---------------------------|-------|---------------------|---------------------|----------------------|---------------------|
| Recurring cost     | Labour                                            | Adult mosquito catchers   | 12    | 12                  | \$5.00              | \$4.30               |                     |
|                    |                                                   | Driver                    | 1     | NA                  | \$0.80              | NA                   |                     |
|                    |                                                   | Surveillance coordinators | NA    | 2                   | \$2.40              | NA                   |                     |
|                    | Field work                                        | Fuel and maintenance cost | NA    | 8km x \$0.5         | \$5.00              | NA                   |                     |
|                    | Office materials                                  | Consumables               |       |                     | \$1.48              | \$1.54               |                     |
|                    | Medical tests                                     |                           |       |                     | \$1.00              | NA                   |                     |
|                    | Miscellaneous cost                                |                           |       |                     | \$2.55              | \$0.58               |                     |
|                    | Total recurring cost per week per sampling site   |                           |       |                     |                     | \$18.23 <sup>a</sup> | \$6.42 <sup>a</sup> |
|                    | Total initial set up and recurring costs per week |                           |       |                     |                     | \$22.88              | \$9.15              |
|                    | Cost per mosquito caught per week                 | <i>An. gambiae s.l.</i>   |       | 0.83                | 0.73                | \$24.97 <sup>a</sup> | \$7.73 <sup>a</sup> |
| <i>Cx. species</i> |                                                   | 130                       | 67.98 | \$0.27 <sup>a</sup> | \$0.05 <sup>a</sup> |                      |                     |

<sup>a</sup>=Cost of sampling one mosquito calculated by dividing the total recurring cost per week per site by the number of mosquitoes caught per week per sampling site.
